# Supplementary material for: Medizinstudierende als Helfende in der Pandemie
Source: Springer Nature journal article supplement (doi:10.1007/s00101-021-01009-3), 2021-07-20
Supplement: MOESM1 [file 19376332]

## Corona-Schulung Studierende Prä

Datum:

Probandencode:

|                                                                                                                                      | trifft<br>überhaupt<br>nicht zu | <input type="radio"/> | <input type="radio"/> | <input type="radio"/> | <input type="radio"/> | <input type="radio"/> | trifft<br>voll zu     |
|--------------------------------------------------------------------------------------------------------------------------------------|---------------------------------|-----------------------|-----------------------|-----------------------|-----------------------|-----------------------|-----------------------|
| Ich erhoffe mir viel von der Fortbildung .                                                                                           |                                 | <input type="radio"/> | <input type="radio"/> | <input type="radio"/> | <input type="radio"/> | <input type="radio"/> | <input type="radio"/> |
| Ich sehe die Fortbildung als Chance, etwas Neues zu lernen.                                                                          |                                 | <input type="radio"/> | <input type="radio"/> | <input type="radio"/> | <input type="radio"/> | <input type="radio"/> | <input type="radio"/> |
| Eigentlich habe ich keine Lust auf die Fortbildung.                                                                                  |                                 | <input type="radio"/> | <input type="radio"/> | <input type="radio"/> | <input type="radio"/> | <input type="radio"/> | <input type="radio"/> |
| Praktische Schulungsmaßnahmen durch klinische Simulation bringen mir nichts, weil im wirklichen Leben sowieso alles anders ist.      |                                 | <input type="radio"/> | <input type="radio"/> | <input type="radio"/> | <input type="radio"/> | <input type="radio"/> | <input type="radio"/> |
| Zeit und Geld für praktische Schulungsmaßnahmen im Schulungs-/Simulationszentrum sollte man besser in sinnvollere Dinge investieren. |                                 | <input type="radio"/> | <input type="radio"/> | <input type="radio"/> | <input type="radio"/> | <input type="radio"/> | <input type="radio"/> |
| Praktische Trainings/Simulationstrainings kommen letztlich den Patientinnen und Patienten zugute.                                    |                                 | <input type="radio"/> | <input type="radio"/> | <input type="radio"/> | <input type="radio"/> | <input type="radio"/> | <input type="radio"/> |
| Ich halte Simulation für ein geeignetes Mittel zum Training praktischer Fertigkeiten.                                                |                                 | <input type="radio"/> | <input type="radio"/> | <input type="radio"/> | <input type="radio"/> | <input type="radio"/> | <input type="radio"/> |
| Andere Formen des Lernens halte ich für viel sinnvoller als Simulation.                                                              |                                 | <input type="radio"/> | <input type="radio"/> | <input type="radio"/> | <input type="radio"/> | <input type="radio"/> | <input type="radio"/> |
| Ich fühle mich bereit, Monitoring (EKG, Sättigung und Blutdruck) beim Intensivpatienten anzulegen.                                   |                                 | <input type="radio"/> | <input type="radio"/> | <input type="radio"/> | <input type="radio"/> | <input type="radio"/> | <input type="radio"/> |
| Ich fühle mich bereit, die angezeigten Monitoring-Kurven zu interpretieren.                                                          |                                 | <input type="radio"/> | <input type="radio"/> | <input type="radio"/> | <input type="radio"/> | <input type="radio"/> | <input type="radio"/> |
| Ich fühle mich bereit, auf Monitoring-Alarme adäquat zu reagieren.                                                                   |                                 | <input type="radio"/> | <input type="radio"/> | <input type="radio"/> | <input type="radio"/> | <input type="radio"/> | <input type="radio"/> |

Ich fühle mich bei der Arbeit an einem intensivmedizinischen Arbeitsplatz sicher.

     

Ich fühle mich bei der Bedienung eines Respirators sicher.

     

Ich fühle mich bereit, adäquat auf Alarme des Respirators zu reagieren.

     

Ich fühle mich bei der Vorbereitung einer Infusion sicher.

     

Ich fühle mich bereit, einen Bettplatz auf Normalstation eigenständig vorzubereiten.

     

Ich fühle mich bereit, die Materialien zur Vorbereitung einer ZVK-Anlage selbst zu übernehmen.

     

Ich fühle mich bereit, die benötigten Materialien für eine Intubation selbst zusammenzustellen.

     

---

### Ich habe in der Vergangenheit bereits eigene Erfahrungen mit Simulationstrainings gemacht.

Ja  Nein

Gar keine Rolle

Eine wichtige Rolle

Bei meiner jetzigen Arbeit / Ausbildung spielt Simulation...
