# Supplementary material for: Medizinstudierende als Helfende in der Pandemie
Source: Springer Nature journal article supplement (doi:10.1007/s00101-021-01009-3), 2021-07-20
Supplement: MOESM2 [file 19376332]

## Corona-Schulung Studierende Post

Datum:

Probandencode:

|                                                                                                                                      | trifft<br>überhaupt<br>nicht zu |                       |                       |                       |                       | trifft<br>voll zu     |
|--------------------------------------------------------------------------------------------------------------------------------------|---------------------------------|-----------------------|-----------------------|-----------------------|-----------------------|-----------------------|
| Ich habe mich wohl gefühlt, die praktische Übung/Simulation in der Gruppe zu machen.                                                 | <input type="radio"/>           | <input type="radio"/> | <input type="radio"/> | <input type="radio"/> | <input type="radio"/> | <input type="radio"/> |
| Ich habe zwischenzeitlich fast vergessen, dass die Praxistätigkeit/Situation nur simuliert war.                                      | <input type="radio"/>           | <input type="radio"/> | <input type="radio"/> | <input type="radio"/> | <input type="radio"/> | <input type="radio"/> |
| Ich konnte mich gut auf die Praxisübung/Simulation einlassen.                                                                        | <input type="radio"/>           | <input type="radio"/> | <input type="radio"/> | <input type="radio"/> | <input type="radio"/> | <input type="radio"/> |
| Ich habe durch die gesamte Schulung (Theorie + Praxisübung/Simulation) etwas Wichtiges und Sinnvolles gelernt.                       | <input type="radio"/>           | <input type="radio"/> | <input type="radio"/> | <input type="radio"/> | <input type="radio"/> | <input type="radio"/> |
| Was ich in der gesamten Schulung (Theorie + Praxisübung/Simulation) gelernt habe, brauche ich auch in meinem Arbeitsalltag.          | <input type="radio"/>           | <input type="radio"/> | <input type="radio"/> | <input type="radio"/> | <input type="radio"/> | <input type="radio"/> |
| Praktische Schulungsmaßnahmen durch klinische Simulation bringen mir nichts, weil im wirklichen Leben sowieso alles anders ist.      | <input type="radio"/>           | <input type="radio"/> | <input type="radio"/> | <input type="radio"/> | <input type="radio"/> | <input type="radio"/> |
| Zeit und Geld für praktische Schulungsmaßnahmen im Schulungs-/Simulationszentrum sollte man besser in sinnvollere Dinge investieren. | <input type="radio"/>           | <input type="radio"/> | <input type="radio"/> | <input type="radio"/> | <input type="radio"/> | <input type="radio"/> |
| Praktische Trainings/Simulationstrainings kommen letztlich den Patientinnen und Patienten zugute.                                    | <input type="radio"/>           | <input type="radio"/> | <input type="radio"/> | <input type="radio"/> | <input type="radio"/> | <input type="radio"/> |
| Ich halte Simulation für ein geeignetes Mittel zum Training praktischer Fertigkeiten.                                                | <input type="radio"/>           | <input type="radio"/> | <input type="radio"/> | <input type="radio"/> | <input type="radio"/> | <input type="radio"/> |
| Andere Formen des Lernens halte ich für viel sinnvoller als Simulation.                                                              | <input type="radio"/>           | <input type="radio"/> | <input type="radio"/> | <input type="radio"/> | <input type="radio"/> | <input type="radio"/> |

Ich fühle mich bereit, Monitoring (EKG, Sättigung und Blutdruck) beim Intensivpatienten anzulegen.

Ich fühle mich bereit, die angezeigten Monitoring-Kurven zu interpretieren.

Ich fühle mich bereit, auf Monitoring-Alarme adäquat zu reagieren.

Ich fühle mich bei der Arbeit an einem intensivmedizinischen Arbeitsplatz sicher.

Ich fühle mich bei der Bedienung eines Respirators sicher.

Ich fühle mich bereit, adäquat auf Alarme des Respirators zu reagieren.

Ich fühle mich bei der Vorbereitung einer Infusion sicher.

Ich fühle mich bereit, einen Bettplatz auf Normalstation eigenständig vorzubereiten.

Ich fühle mich bereit, die Materialien zur Vorbereitung einer ZVK-Anlage selbst zu übernehmen.

Ich fühle mich bereit, die benötigten Materialien für eine Intubation selbst zusammenzustellen.

---

## Insgesamt fand ich die Praxisübung/Simulation...

Sehr schlecht

Sehr gut

Umfrage erstellt mit

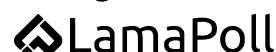

---

## Das Thema der Praxisübung/Simulation hat mich...

Gar nicht interessiert

Sehr  
interessiert

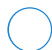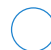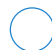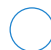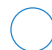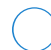

---

## Folgende Aspekte waren besonders relevant und hilfreich:

---

## Folgende Aspekte haben gefehlt oder sind zu kurz gekommen:

---

## Folgende Aspekte haben mir nicht gefallen:
