# Supplementary material for: Medizinstudierende als Helfende in der Pandemie
Source: Springer Nature journal article supplement (doi:10.1007/s00101-021-01009-3), 2021-07-20
Supplement: MOESM3 [file 19376332]

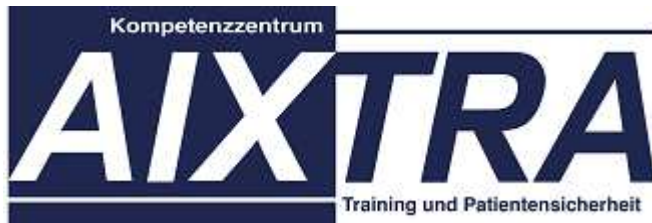

## Umfrage zum Einsatz von Studierenden während der Corona-Pandemie

Liebe Studierende,

vielen Dank, dass Sie sich die Zeit nehmen, diesen Fragebogen auszufüllen. Dieser Fragebogen fragt nach Ihren Meinungen rund um Ihren Einsatz als Pflegehelfer/in auf den Intensivstationen im Rahmen der Covid-19-Pandemie. Die Bearbeitung dauert etwa 10 Minuten.

Die Teilnahme an der Umfrage ist **freiwillig**. Wir hoffen jedoch auf viele Teilnehmer\*innen, um aussagekräftige Ergebnisse generieren zu können. Die Erhebung erfolgt **anonym**. Niemand wird Ihre Antworten Ihrer Person zuordnen können. Aus Zuordnungsgründen erstellen Sie einen Probandencode, der nur Ihnen bekannt ist.

Der Fragebogen möchte nur Ihre Vorstellungen und Meinungen erfragen. Es gibt keine richtigen oder falschen Antworten.

Für weitere Fragen stehen wir Ihnen gerne zur Verfügung.

Vielen herzlichen Dank für die Teilnahme!

Das AIXTRA-Team

Ansprechpartner:

Dr. Saša Sopka, MME, Leiter AIXTRA – Kompetenzzentrum für Training und Patientensicherheit, Tel.: 0241/80 35355, [ssopka@ukaachen.de](mailto:ssopka@ukaachen.de)

Kim Pears, AIXTRA – Kompetenzzentrum für Training und Patientensicherheit, [kpears@ukaachen.de](mailto:kpears@ukaachen.de)

Michelle Schmidt, AIXTRA – Kompetenzzentrum für Training und Patientensicherheit, [mischmidt@ukaachen.de](mailto:mischmidt@ukaachen.de)

Umfrage erstellt mit

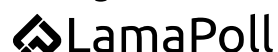

## ★ Probandencode

Bitte tragen Sie hier aus Zuordnungsgründen Ihren **individuellen Code** nach folgendem Schema ein:

**Anfangsbuchstabe Vorname Ihrer Mutter**

**Anfangsbuchstabe Vorname Ihres Vaters**

**Geburtstag Ihrer Mutter**

**Geburtstag Ihres Vaters**

Beispiel:

Vorname Mutter: Anna => A

Vorname Vater: Max => M

Geburtstag Mutter: 05. März => 05

Geburtstag Vater: 12. November => 12

Beispielcode: AM0512

Individueller Code

Umfrage erstellt mit

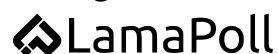

---

## Fachsemester

*Ich studiere im Sommersemester 2020 im Fachsemester...*

- 1
- 2
- 3
- 4
- 5
- 6
- 7
- 8
- 9
- 10
- 11
- 12
- >12

---

## Ausbildung

Ich habe vor dem Medizinstudium bereits eine Ausbildung im medizinischen Bereich abgeschlossen.

- Ja     Nein

## Falls ja, welche Ausbildung?

Welche Ausbildung haben Sie abgeschlossen?

## Bitte bewerten Sie folgende Aussagen:

Bitte wählen Sie für jede Aussage die für Sie zutreffende Antwortmöglichkeit aus.

|                                                                                               | Stimme<br>überhaupt<br>nicht zu |                       |                       |                       |                       | Stimme<br>voll zu     |
|-----------------------------------------------------------------------------------------------|---------------------------------|-----------------------|-----------------------|-----------------------|-----------------------|-----------------------|
| Ich fühlte mich durch meine<br>Arbeitsaufgaben oft überfordert.                               | <input type="radio"/>           | <input type="radio"/> | <input type="radio"/> | <input type="radio"/> | <input type="radio"/> | <input type="radio"/> |
| Mein Stresslevel durch die Arbeit war<br>hoch.                                                | <input type="radio"/>           | <input type="radio"/> | <input type="radio"/> | <input type="radio"/> | <input type="radio"/> | <input type="radio"/> |
| Ich erlebte Dinge bei meiner Arbeit, die<br>mich psychisch belasteten.                        | <input type="radio"/>           | <input type="radio"/> | <input type="radio"/> | <input type="radio"/> | <input type="radio"/> | <input type="radio"/> |
| Ich hatte Angst, bei meiner Arbeit<br>aufgrund von mangelndem Fachwissen<br>Fehler zu machen. | <input type="radio"/>           | <input type="radio"/> | <input type="radio"/> | <input type="radio"/> | <input type="radio"/> | <input type="radio"/> |
| Bei meiner Arbeit kannte ich meine Rolle<br>und meine Zuständigkeiten genau.                  | <input type="radio"/>           | <input type="radio"/> | <input type="radio"/> | <input type="radio"/> | <input type="radio"/> | <input type="radio"/> |
| Ich fühlte mich ins Team eingebunden<br>und akzeptiert.                                       | <input type="radio"/>           | <input type="radio"/> | <input type="radio"/> | <input type="radio"/> | <input type="radio"/> | <input type="radio"/> |
| Ich fühlte mich von den Patienten<br>akzeptiert.                                              | <input type="radio"/>           | <input type="radio"/> | <input type="radio"/> | <input type="radio"/> | <input type="radio"/> | <input type="radio"/> |
| Ich erfuhr von den anderen<br>Teammitgliedern Wertschätzung für<br>meine Arbeit.              | <input type="radio"/>           | <input type="radio"/> | <input type="radio"/> | <input type="radio"/> | <input type="radio"/> | <input type="radio"/> |
| Ich litt unter arbeitsbedingter<br>Erschöpfung.                                               | <input type="radio"/>           | <input type="radio"/> | <input type="radio"/> | <input type="radio"/> | <input type="radio"/> | <input type="radio"/> |
| Ich empfand meine Arbeit als erfüllend.                                                       | <input type="radio"/>           | <input type="radio"/> | <input type="radio"/> | <input type="radio"/> | <input type="radio"/> | <input type="radio"/> |
| Mein Privatleben litt unter meiner Arbeit.                                                    | <input type="radio"/>           | <input type="radio"/> | <input type="radio"/> | <input type="radio"/> | <input type="radio"/> | <input type="radio"/> |
| Die Schulung im AIXTRA hat mich gut auf<br>meinen Arbeitsalltag vorbereitet.                  | <input type="radio"/>           | <input type="radio"/> | <input type="radio"/> | <input type="radio"/> | <input type="radio"/> | <input type="radio"/> |
| Bei Fragen oder Unsicherheiten hatten<br>meine Vorgesetzten immer ein offenes<br>Ohr.         | <input type="radio"/>           | <input type="radio"/> | <input type="radio"/> | <input type="radio"/> | <input type="radio"/> | <input type="radio"/> |

Ohr für mich.

Fehler und Probleme wurden auf unserer Station nicht vernünftig aufgearbeitet.

Ich hatte das Gefühl, durch meine Arbeit etwas Wichtiges und Sinnvolles zu tun.

Ich bereue, dass ich mich freiwillig gemeldet habe.

Ich fühlte mich sicher, Monitoring (EKG, Sättigung und Blutdruck) beim Intensivpatienten anzulegen.

Ich fühlte mich sicher, die angezeigten Monitoring-Kurven zu interpretieren.

Ich fühlte mich sicher, auf Monitoring-Alarme adäquat zu reagieren.

Ich fühlte mich bei der Arbeit an einem intensivmedizinischen Arbeitsplatz sicher.

Ich fühlte mich bei der Bedienung eines Respirators sicher.

Ich fühlte mich sicher, adäquat auf Alarme des Respirators zu reagieren.

Ich fühlte mich bei der Vorbereitung einer Infusion sicher.

Ich fühlte mich sicher, einen Bettplatz auf Normalstation eigenständig vorzubereiten.

Ich fühlte mich sicher, die Materialien zur Vorbereitung einer ZVK-Anlage selbst zu übernehmen.

Ich fühlte mich sicher, die benötigten Materialien für eine Intubation selbst zusammenzustellen.

Umfrage erstellt mit

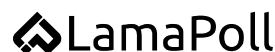

## Anregungen & Wünsche

Sollte ein weiterer Einsatz notwendig werden, würde ich mir folgende Themen für eine Schulung wünschen:

Für meine Arbeit auf der Station hätte ich mir gewünscht, dass ...
